# Supplementary material for: Phylodynamic Analysis Suggests That Deer Species May Be a True Reservoir for Hepatitis E Virus Genotypes 3 and 4
Source: MDPI journal article supplement (doi:10.3390/microorganisms11020375), 2023-02-01
Supplement: s1 [file s1]

**Supplementary Table S1.** Models used for Bayesian analysis of different HEV sequence datasets.

|         | Sequence subset 1 |                 | Sequence subset 2 |                 | Sequence subset 3 |                   | Sequence subset 4 |                  |
|---------|-------------------|-----------------|-------------------|-----------------|-------------------|-------------------|-------------------|------------------|
| model   | "-lnL"            | AIC             | "-lnL"            | AIC             | "-lnL"            | AIC               | "-lnL"            | AIC              |
| JC      | 16765,07          | 34554,15        | 14202,52          | 29753,05        | 20869,0388        | 43310,0776        | 2232,2608         | 4636,5216        |
| JC+I    | 15314,93          | 31655,86        | 13094,88          | 27539,76        | 19266,7387        | 40107,4775        | 1977,4460         | 4128,8921        |
| JC+G    | 14101,53          | 29229,06        | 12197,20          | 25744,40        | 17646,3899        | 36866,7798        | 1919,4280         | 4012,8561        |
| JC+I+G  | 14091,41          | 29210,81        | 12169,91          | 25691,81        | 17647,2055        | 36870,4110        | 1926,0172         | 4028,0343        |
| F81     | 16390,68          | 33811,36        | 14030,37          | 29414,73        | 20193,9578        | 41965,9155        | 2221,8965         | 4621,7930        |
| F81+I   | 14950,57          | 30933,14        | 12926,70          | 27209,40        | 18599,7378        | 38779,4756        | 1969,7905         | 4119,5810        |
| F81+G   | 13535,97          | 28103,94        | 11906,13          | 25168,26        | 16691,8476        | 34963,6951        | 1899,8483         | 3979,6967        |
| F81+I+G | 13490,01          | 28014,02        | 11888,38          | 25134,76        | 16620,3300        | 34822,6600        | 1906,8889         | 3995,7777        |
| K80     | 15082,80          | 31191,60        | 12749,13          | 26848,26        | 18881,0136        | 39336,0272        | 2114,4796         | 4402,9591        |
| K80+I   | 13591,15          | 28210,31        | 11576,41          | 24504,82        | 17256,1051        | 36088,2102        | 1832,4891         | 3840,9783        |
| K80+G   | 12208,36          | 25444,71        | 10519,69          | 22391,38        | 15464,6154        | 32505,2308        | 1765,5960         | 3707,1920        |
| K80+I+G | 12194,26          | 25418,53        | 10521,11          | 22396,23        | 15488,9741        | 32555,9482        | 1769,6402         | 3717,2804        |
| HKY     | 14869,13          | 30770,26        | 12604,55          | 26565,09        | 18375,5486        | 38331,0972        | 2093,0428         | 4366,0856        |
| HKY+I   | 13379,05          | 27792,10        | 11471,60          | 24301,20        | 16816,3867        | 35214,7734        | 1823,3928         | 3828,7857        |
| HKY+G   | 12088,10          | 25210,20        | 10445,87          | 22249,73        | 15248,0517        | 32078,1033        | 1756,3885         | 3696,7769        |
| HKY+I+G | 12087,52          | 25211,04        | 10448,03          | 22256,07        | 15267,2246        | 32118,4492        | 1763,9472         | 3711,8944        |
| SYM     | 14776,36          | 30586,71        | 12576,19          | 26510,37        | 18285,4280        | 38152,8561        | 2083,3756         | 4348,7511        |
| SYM+I   | 13330,25          | 27696,51        | 11430,84          | 24221,68        | 16733,1503        | 35050,3005        | 1814,1634         | 3812,3268        |
| SYM+G   | 12078,40          | 25192,81        | 10435,50          | 22231,01        | 15267,4100        | 32118,8200        | 1753,8094         | 3699,6188        |
| SYM+I+G | <b>12018,77</b>   | <b>25079,53</b> | 10450,22          | 22262,44        | 15278,6300        | 32143,2600        | 1760,4260         | 3706,8520        |
| GTR     | 14755,96          | 30551,93        | 12552,06          | 26468,12        | 18194,5989        | 37977,1977        | 2076,5844         | 4341,1688        |
| GTR+I   | 13308,08          | 27658,16        | 11424,36          | 24214,71        | 16695,0191        | 34980,0382        | 1817,3856         | 3824,7713        |
| GTR+G   | 12083,10          | 25204,20        | 10411,04          | 22190,07        | <b>15222,3188</b> | <b>32034,6376</b> | 1755,1423         | 3700,2845        |
| GTR+I+G | 12024,79          | 25093,58        | <b>10399,50</b>   | <b>22165,01</b> | 15223,3383        | 32038,6766        | <b>1755,8540</b>  | <b>3693,7080</b> |

"-lnL" - Negative log-likelihood

AIC - Akaike information criterion

The smallest values of the criterion are highlighted in red bold

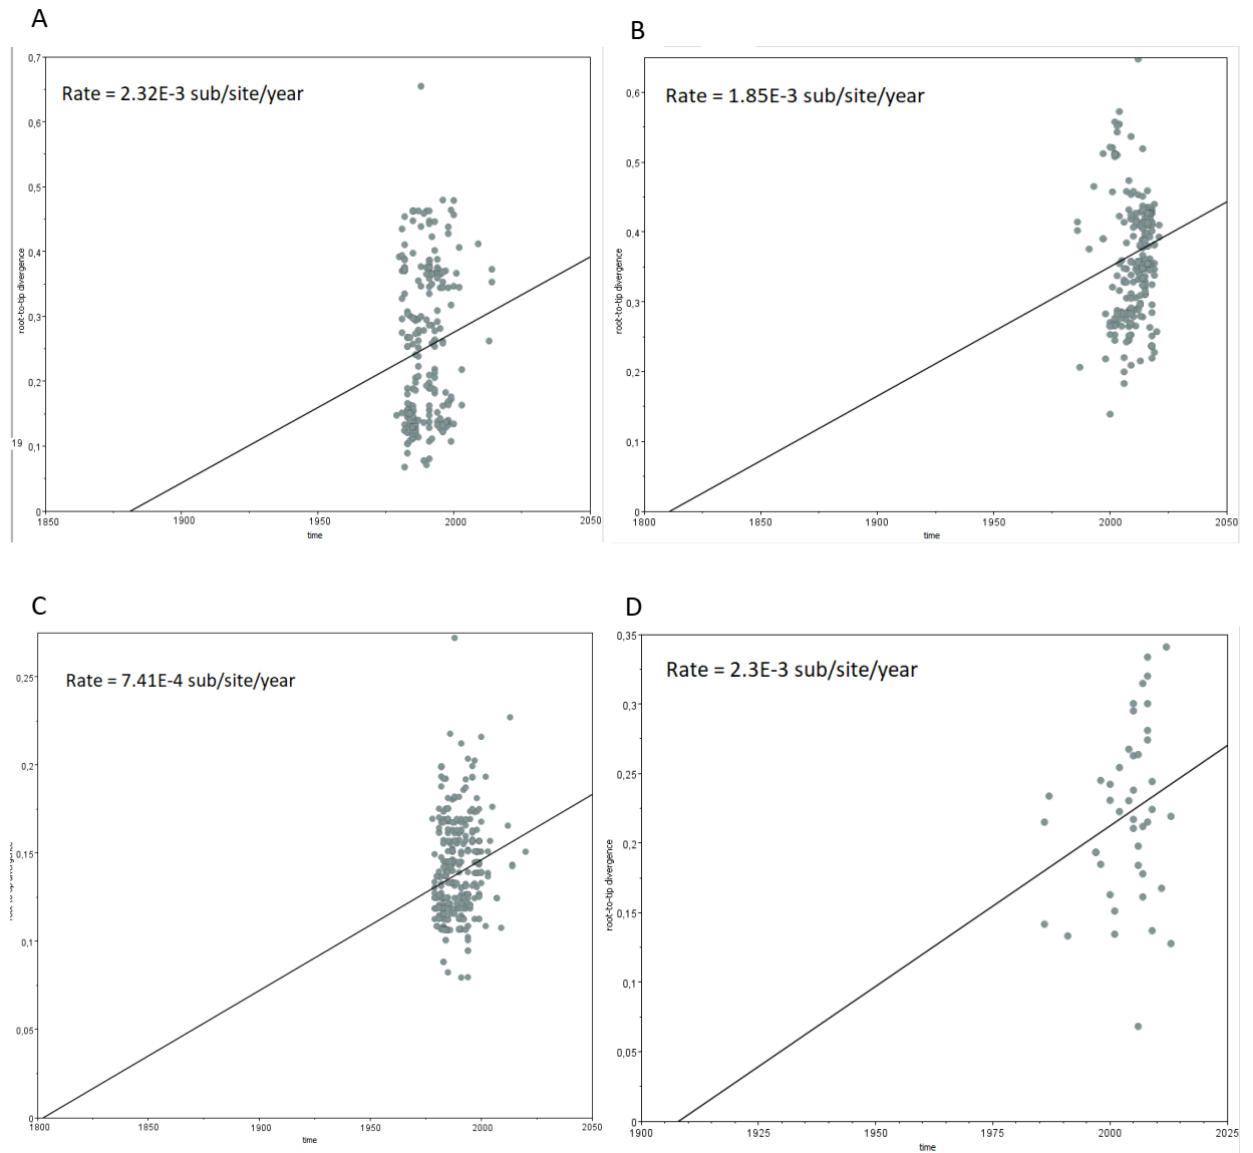

**Supplementary Figure S1.** Temporal signal linear regression graphs for four HEV sequence subsets: ORF1 sequences, nt positions 125 – 450 (A); ORF1 sequences, nt positions 4071 – 4350 (B); ORF2 sequences, nt positions 5762 – 6105 (C); ORF2 sequences, nt positions 6109 – 6256. Nt positions are given by reference sequence M73218.
